# Supplementary material
Source: publisher figshare collection journal article supplement (https://acs.figshare.com/ndownloader/files/5524676)
Supplement: Supplementary file 1 [file 5524676]

## SUPPORTING INFORMATION

(Supplementary Materials)

### List of Supplemental Material

**Table. S1.** Physical models used in 3D-CFD simulations

**Table. S2.** Engine physical parameters in 3D-CFD simulations

**Figure S1.** Comparisons of the mole fraction profiles of  $C_2H_2$  in a JSR at  $p = 10$  atm,  $\tau = 1$  s,  $\phi = 0.3, 0.5, 1.0$ , and  $1.5$  between the simulated results and the experimental data

33

**Figure S2.** Computational grids with a cell number of around 100,000 for the 3-D CFD engine simulation, including an intake valve and an exhaust valve.

**Figure S3.** Simulated mole fraction profiles of H atom and  $CH_3$  radical.

**Table. S1.** Physical models used in 3D-CFD simulations

|                              |                     |
|------------------------------|---------------------|
| Turbulent Dispersion         | O'Rourke model      |
| Drop Evaporation Model       | Frossling model     |
| Collision model              | NTC collision model |
| Spray-wall interaction model | Wall film model     |
| Critical value for splashing | 3330.0              |
| Fraction splashed            | 1.0                 |
| Rebound Weber number         | 5.0                 |
| Separation constant          | 3.0                 |
| Turbulence Model             | RANS                |
| Karmen's constant            | 0.42                |
| Wall heat transfer model     | O'Rourke and Amsden |

**Table. S2.** Engine physical parameters in 3D-CFD simulations

---

|                        |            |
|------------------------|------------|
| Bore*Stroke            | 105*125 mm |
| Crevice Volume         | 1081.8 mL  |
| Speed                  | 2500 r/min |
| Connecting Rod Length  | 210 mm     |
| Valve Number           | 4          |
| Compression Ratio      | 16:1       |
| Swirl Ratio            | 1.6        |
| Chamber Volume         | 61.6 mL    |
| Total Injected Mass    | 30 mg      |
| Intake Air Pressure    | 0.15 MPa   |
| Intake Air Temperature | 300 K      |

---

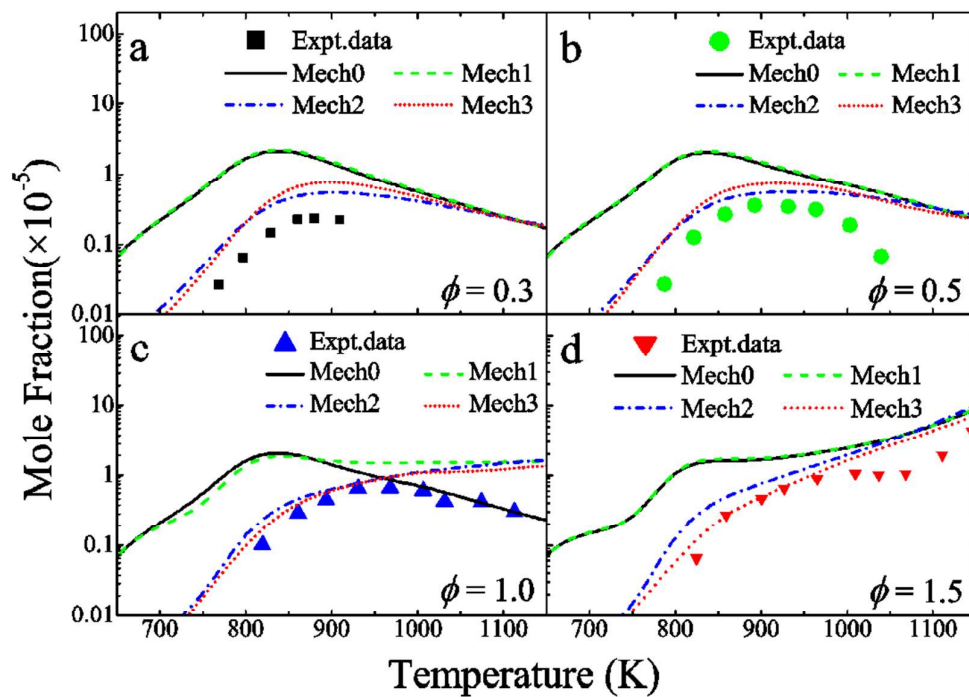

**Figure S1.** Comparisons of the mole fraction profiles of  $C_2H_2$  in a JSR at  $p = 10$  atm,  $\tau = 1$  s,  $\phi = 0.3, 0.5, 1.0$ , and  $1.5$  between the simulated results and the experimental data

33

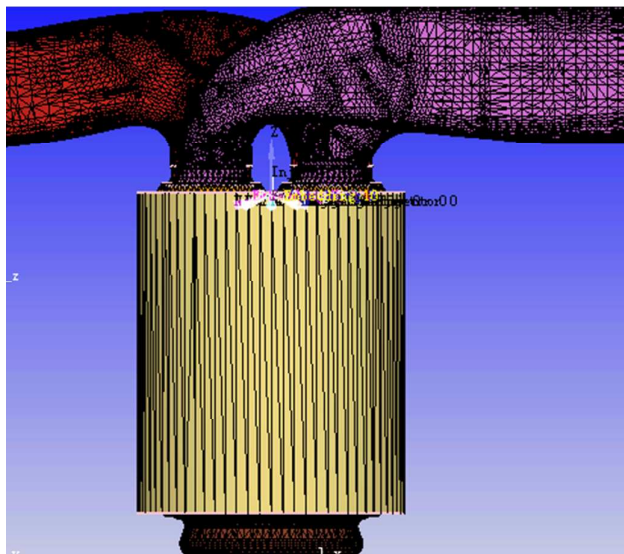

**Figure S2.** Computational grids with a cell number of around 100,000 for the 3-D CFD engine simulation, including an intake valve and an exhaust valve.

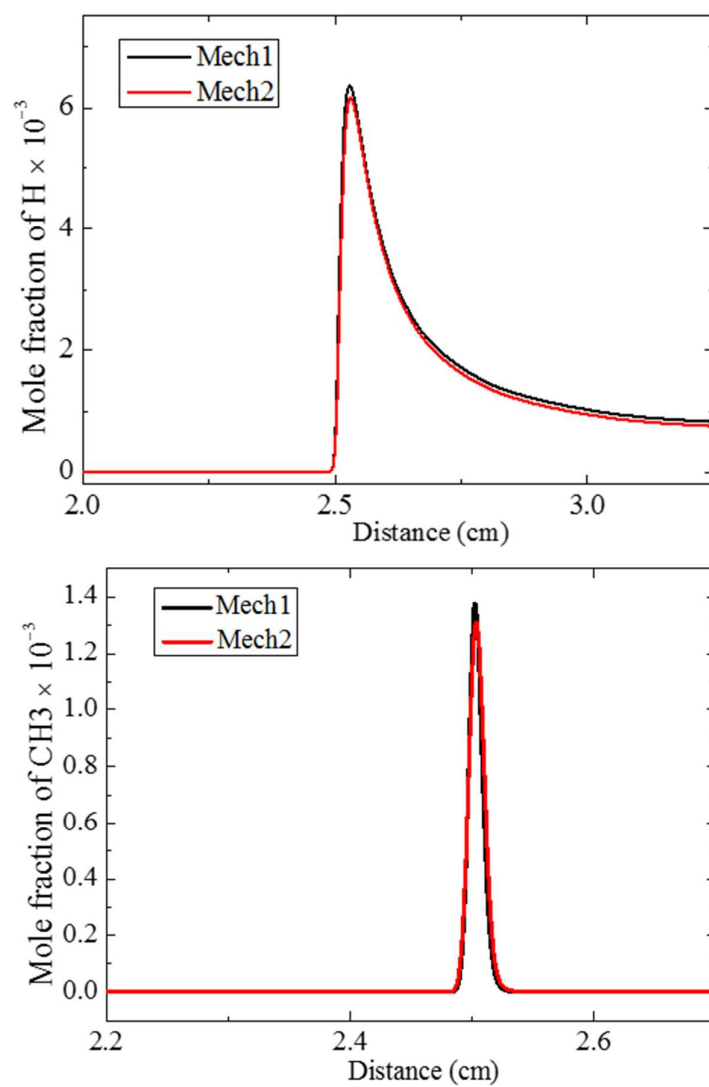

**Figure S3.** Simulated mole fraction profiles of H atom and  $\text{CH}_3$  radical.
